# Supplementary material for: P-values – a chronic conundrum
Source: PubMed Central journal article supplement (PMC7315482; doi:10.1186/s12874-020-01051-6), 2020-06-24
Supplement: 12874_2020_1051_MOESM1_ESM.pdf [file 12874_2020_1051_MOESM1_ESM.pdf]

## P-Values – A Chronic Conundrum

### Derivation of the Calibrated P-values

The lower bound is derived based on conditional frequentist testing (Kiefer, 1977 JASA; Berger, Brown and Wolpert, 1994 AOS). After assessing different options, Berger and colleagues found  $p$ -value conditioning and the Beta distribution  $Beta(\xi, 1) = \xi p^{\xi-1}$  for  $H_1$  most desirable for practical purposes given that  $p$  has a uniform distribution  $U(0, 1)$  under  $H_0$ . With the conditioning statistic  $C = \max\{p_0, p_1\} = \max\{p, \xi p^{\xi-1}\}$ , where  $p_0$  is the  $p$ -value from testing  $H_0$  against  $H_1$ , and  $p_1$  is the  $p$ -value from testing  $H_1$  against  $H_0$ , the resultant conditional frequentist test is devised as (Sellke, Bayarri and Berger, 2001 Am Stat):

If  $p \leq \eta$ , reject  $H_0$  and report type I conditional error probability  $\alpha_\xi(p) = (1 + \xi p^{\xi-1})^{-1}$ ; and on the other hand, if  $p > \eta$ , accept  $H_0$  and report type II conditional error probability  $\beta_\xi(p) = (1 + \xi^{-1} p^{1-\xi})^{-1}$ , where  $\eta$  is the solution of the equation  $\eta = 1 - \eta^\xi$ .

It can be readily shown that the lower bound of  $\alpha_\xi(p) = (1 + \xi p^{\xi-1})^{-1}$  is  $\alpha(p) = \{1 + [-e \times p \times \ln(p)]^{-1}\}^{-1}$ ; in other words,  $\alpha_\xi(p) = (1 + \xi p^{\xi-1})^{-1} \geq \alpha(p) = \{1 + [-e \times p \times \ln(p)]^{-1}\}^{-1}$ , for  $p < e^{-1}$ .

It is worth emphasizing that the lower bound holds for any value of  $0 < \xi \leq 1$ , and the calibration is fully frequentist although it can have a Bayesian interpretation. Further, although the class of  $Beta(\xi, 1)$  densities of  $p$  under  $H_1$  may not be “general” enough to cover all the possible alternatives theoretically, the lower bound indeed meets practical needs since it is also valid over a variety of nonparametric alternatives (Sellke, Bayarri and Berger, 2001 Am Stat).
